# Supplementary material for: Adhesive lift method for patterning arbitrary-shaped thin ion-selective films in micro/nanofluidic device
Source: Royal Society of Chemistry journal article supplement (doi:10.1039/d2lc00185c), 2022-01-01
Supplement: d2lc00185c3.pdf [file d2lc00185c3.pdf]

## VIDEO CAPTIONS

**SI Video 1.** Supplementary video for Figure 4. The videos of IDZ when the nanoporous film was (a) partially patterned and (b) patterned without plasma treatment in step Figure 1(ii) (Scene at 00:05 ~ 00:15). The videos of IDZ initiated at the main channel boundaries with square, sine wave shape in SC regime (5  $\mu\text{m}$  depth), sawtooth wave shape in EOF regime (15  $\mu\text{m}$  depth), and triangle, fractal wave shape in EOI regime (150  $\mu\text{m}$  depth). The boundaries of IDZ in the SC regime was shown to be stable, while the boundaries in the EOI regime was shown to be unstable (Scene at 00:15 ~ 00:37).

**SI Video 2.** Supplementary video for Figure 7. The videos of IDZ induced at the main channel boundaries of sine wave with various wavelengths ( $L = 100 \mu\text{m}$ ,  $200 \mu\text{m}$ ,  $500 \mu\text{m}$ ,  $1000 \mu\text{m}$  and  $\infty$ (flat)) in EOI regime (150  $\mu\text{m}$  depth), and in EOF regime (15  $\mu\text{m}$  depth). In the case of the EOI regime, IDZ expanded from the trough of the waveform as  $L$  decreases, while IDZ uniformly expanded regardless of the wavelength.
